# Supplementary material for: 16S rRNA gene sequencing and healthy reference ranges for 28 clinically relevant microbial taxa from the human gut microbiome
Source: PubMed Central journal article supplement (PMC5414997; doi:10.1371/journal.pone.0176555), 2017-05-03
Supplement: pone.0176555.s004.pdf [file pone.0176555.s004.pdf]

## Table S4

### Synthetic DNA sequences (sDNA) for the experimental validation

The following representative synthetic double-stranded DNA (sDNA) gene blocks were synthesized for the 28 taxa in the target list. These sDNA sequences were run through the clinical pipeline to validate accurate and quantitative detection.

| Target                                                           | sDNA sequence                                                                                                                                                                                                                                                                                                                                                                                                                                                                         |
|------------------------------------------------------------------|---------------------------------------------------------------------------------------------------------------------------------------------------------------------------------------------------------------------------------------------------------------------------------------------------------------------------------------------------------------------------------------------------------------------------------------------------------------------------------------|
| <i>Akkermansia muciniphila</i><br>SILVA ID:<br>AY271254.1.1433   | TTCGGATTGTAAACCCCTGTCATGTGGGAGCAAATTA AAAAGATAGTACCACAAGAGGAAGAGAC<br>GGCTAACTCTGTGCCAGCAGCCGCGGTAATACAGAGGTCTCAAGCGTTGTTCCGGAATCACTGGG<br>CGTAAAGCGTGCGTAGGCTGTTTCGTAAGTTCGTGTGTGAAAGGCGCGGGCTCAACCCGCGGAC<br>GGCACATGATACTGCGAGACTAGAGTAATGGAGGGGGAACCGGAATTCTCGGTGTAGCAGTGAA<br>ATGCGTAGATATCGAGAGGAACACTCGTGGCGAAGGCGGGTTCCTGGACATTA ACTGACGCTGA<br>GGCACGAAGGCCAGGGGAGCGAAAGGGATTAGATACCCTGTAGTCCTGGCAGTAAACGGTGC<br>ACGCTTGGTGTGCGGGGAATCGACCCCCTGCGTGCCGGAGTAACGCGTTAAGCGTGCCG |
| <i>Alistipes</i><br>SILVA ID:<br>AB554232.1.1488                 | TGCTTTTGTACGAGGGTAAACGCAGATACGTGTATCTGTCTGAAAGTATCGTACGAATAAGGATCG<br>GCTAACTCCGTGCCAGCAGCCGCGGTAATACGGAGGATTCAAGCGTTATCCGGATTTATTGGGT<br>TAAAGGGTGCGTAGGCGGTTTGATAAGTTAGAGGTGAAATTCGGGGCTCAACCCCTGAACGTGC<br>CTCTAATACTGTTGAGCTAGAGAGTAGTTGCGGTAGGCGGAATGTATGGTGTAGCGGTGAAATGCT<br>TAGAGATCATA CAGAACACCGATTGCGAAGGCAGCTTACCAAATATATCTGACGTTGAGGCACG<br>AAAGCGTGGGGAGCAAACAGGATTAGATACCCTGGTAGTCCACGCAGTAAACGATGATAACTCGT<br>TGTCGGCGATACACAGTCGGTGACTAAGCGAAAGCGATAAGTTATCCACCT     |
| <i>Anaerotruncus colihominis</i><br>SILVA ID:<br>AJ315980.1.1393 | CGGTCTTCGGATTGTAAACCTCTGTCTTTGGGGAAGAAAATGACGGTACCCAAAGAGGAAGCTC<br>CGGCTAACTACGTGCCAGCAGCCGCGGTAATACGTAGGGAGCAAGCGTTGTCCGGAATTA CTGG<br>GTGTAAGGGAGCGTAGGCGGGATGGCAAGTAGAATGTAAATCCATCGGCTCAACCCGTGGCT<br>GCGTTCTAAACTGCCGTTCTTGAGTGAAGTAGAGGCAGGCGGAATTCCTAGTGTAGCGGTGAAAT<br>GCGTAGATATTAGGAGGAACACCAGTGGCGAAGGCGGCCTGCTGGGCTTTAACTGACGCTGAG<br>GCTCGAAAGCGTGGGGAGCAAACAGGATTAGATACCCTGGTAGTCCACGCCGTAAACGATGATTA<br>CTAGGTGTGGGGGACTGACCCCTTCCGTGCCGCAGTTAACACAATAAGTAATCCA       |
| <i>Bacteroides fragilis</i><br>SILVA ID:<br>X83936.1.1436        | TTCTTTTATATAAGAATAAAGTGCAGTATGTATACTGTTTTGTATGTATTATATGAATAAGGATCGGCTAA<br>CTCCGTGCCAGCAGCCGCGGTAATACGGAGGATCCGAGCGTTATCCGGATTTATTGGGTTTAAAG<br>GGAGCGTAGGTGGACTGGTAAGTCAGTTGTGAAAGTTTTCGGCTCAACCGTAAAATTGCAGTTGA<br>TACTGTCAGTCTTGAGTACAGTAGAGGTGGGCGGAATTCGTGGTGTAGCGGTGAAATGCTTAGATA<br>TCACGAAGA ACTCCGATTGCGAAGGCAGCTCACTGGACTGCAACTGACACTGATGCTCGAAAGT<br>GTGGGTATCAAACAGGATTAGATACCCTGGTAGTCCACACAGTAAACGATGAATACTCGCTGTTTG<br>CGATATACAGTAAGCGGCCAAGCGAAAGCATTAAAGTATTCCACCT  |

|                                                                              |                                                                                                                                                                                                                                                                                                                                                                                                                                                                                                  |
|------------------------------------------------------------------------------|--------------------------------------------------------------------------------------------------------------------------------------------------------------------------------------------------------------------------------------------------------------------------------------------------------------------------------------------------------------------------------------------------------------------------------------------------------------------------------------------------|
| <p><i>Barnesiella</i><br/>SILVA ID:<br/>AB370251.1.1484</p>                  | <p>CTCTTTTGTCTGGAGAGTAAAGTACGCTACGTGTAGCGTATTGCAAGTATCCGAAGAAAAAGCATCG<br/>GCTAACTCCGTGCCAGCAGCCGCGGTAATACGGAGGATGCGAGCGTTATCCGGATTTATTGGGTT<br/>TAAAGGGTGCCTAGGCGGCACGCCAAGTCAGCGGTGAAATTTCCGGGCTCAACCCGGAGTGTG<br/>CCGTTGAAACTGGCGAGCTAGAGTACACAAGAGGCAGGCGGAATGCGTGGTGTAGCGGTGAAA<br/>TGCATAGATATCACGCAGAACCCCGATTGCGAAGGCAGCCTGCTAGGGTGAACAGACGCTGAG<br/>GCACGAAAGCGTGGGTATCGAACAGGATTAGATACCCTGGTAGTCCACGCAGTAAACGATGAATA<br/>CTAACTGTTTGCATACAATGTAAGCGGTACAGCGAAAGCGTTAAGTATTCCACCT</p>   |
| <p><i>Bifidobacterium</i><br/>SILVA ID:<br/>AY305304.1.1448</p>              | <p>GGTTGTAAACCGCTTTTACTGACTGGGAGCAAGCCCTTCGGGGTGAGTGTACCTTTCAATAAGCAC<br/>CGGCTAACTACGTGCCAGCAGCCGCGGTAATACGTAGGGTGCAAGCGTTATCCGGAATTATTGGG<br/>CGTAAAGGGCTCGTAGGCGGTTCTGTCGCGTCCGGTGTGAAAGTCCATCGCTTAACGGTGGATCC<br/>GCGCCGGGTACGGGCGGGCTTGAGTGCAGTGGGGAGACTGGAATTTCCGGTGTAAACGGTGG<br/>AATGTGTAGATATCGGGAAGAACCAATGGCGAAGGCAGGTCTCTGGGCCGTCACTGACGCTG<br/>AGGAGCGAAAGCGTGGGAGCGAACAGGATTAGATACCCTGGTAGTCCACGCCGTAAACGGTG<br/>GATGCTGGATGTGGGGACCATTCCACGGTCTCCGTGTCTGGAGCCAACGCGTTAAGCATCC</p> |
| <p><i>Butyrivibrio crossotus</i><br/>SILVA ID:<br/>ABWN01000012.312.1822</p> | <p>AGTATTTCCGGTATGTAAGCTCTATCAGCAGGGAAGAAAACGACGGTACCTGACTAAGAAGCCCC<br/>GGCTAACTACGTGCCAGCAGCCGCGGTAATACGTAGGGGGCAAGCGTTATCCGGATTTACTGGG<br/>TGTAAGGGGAGCGTAGACGGCATCAAGTCAGAAGTAAAATCCGGGGCTCAACCCCGGAAC<br/>TGCTTTTGAAGTGTGGAGCTGGAGTGCAGGAGAGGTAAGCGGAATTCCTAGTGTAGCGGTGAA<br/>ATGCGTAGATATTAGGAGGAACACCAGTGGCGAAGGCGGCTTACTGGACTGTAAGTACGTTGA<br/>GGCTCGAAAGCGTGGGGAGCAAACAGGATTAGATACCCTGGTAGTCCACGCCGTAAACGATGAA<br/>TACTAGGTGTTGGGTTTCATAAGAAGCTCGGTGCCGGCGCAAACGCATTAAGTATTCC</p>       |
| <p><i>Campylobacter</i><br/>SILVA ID:<br/>GU255922.1.1207</p>                | <p>ACTTTTTCGGAGCGTAAACTCCTTTTGTAGGGGAAGAACAATGACGGTACCTAACGAATAAGCACCC<br/>GGCTAACTCCGTGCCAGCAGCCGCGGTAATACGGAGGGTGCAAGCGTTACTCGGAATCACTGG<br/>GCGTAAAGGACGCGTAGGCGGATTATCAAGTCTCTTGTGAAATCCTATGGCTTAACCATAGAAGT<br/>CTTGGGAAACTGATAATCTAGAGTGAGGGAGAGGCAGATGGAATTGGTGGTGTAGGGGTAAATC<br/>CGTAGAGATCACCAGGAATACCCATTGCGAAGGCGATCTGCTGGAACCAACTGACGCTAATGC<br/>GTGAAAGCGTGGGGAGCAAACAGGATTAGATACCCTGGTAGTCCACGCCCTAAACGATGTACT<br/>AGTTGTTGCTAAGCTAGTCTTGGCAGTAATGCACCTAACGGATTAAGTATACCG</p>     |
| <p><i>Collinsella aerofaciens</i><br/>SILVA ID:<br/>AJ245919.1.1432</p>      | <p>CCGGCTAACTACGTGCCAGCAGCCGCGGTAATACGTAGGGGGCGAGCGTTATCCGGATTCATTG<br/>GGCGTAAAGCGCGCGTAGGCGGCCCGGAGGCGGGGGTGAAGCGGGGGGCTCAACCCC<br/>CCGAAGCCCCCGAACCTCCGCGGCTTGGGTCCGGTAGGGGAGGGTGAACACCCGGTGTG<br/>GCGGTGGAATGCGCAGATATCGGGTGAACACCGGTGGCGAAGGCGGCCCTCTGGGCCGAGA<br/>CCGACGCTGAGGCGCGAAAGCTGGGGAGCGAACAGGATTAGATACCCTGGTAGTCCCAGCCG<br/>TAAACGATGGACGCTAGGTGTGGGGACGATCCCCCGTGCCGCAGCCAACGCATTAAGCGTC<br/>CCGCCT</p>                                                                          |

|                                                                                                                                                                                                                             |                                                                                                                                                                                                                                                                                                                                                                                                                                                                                                  |
|-----------------------------------------------------------------------------------------------------------------------------------------------------------------------------------------------------------------------------|--------------------------------------------------------------------------------------------------------------------------------------------------------------------------------------------------------------------------------------------------------------------------------------------------------------------------------------------------------------------------------------------------------------------------------------------------------------------------------------------------|
| <p><i>Desulfovibrio piger</i><br/>SILVA ID:<br/>KF536745.1.1424</p>                                                                                                                                                         | <p>CAGAAGGGAAGAACTAGGGTGTCTAATCATCATCCTACTGACGGTACCTTCAAAGGAAGCACC<br/>GGCTAACTCCGTGCCAGCAGCCGCGGTAATACGGAGGGTGCAAGCGTTAATCGGAATCACTGG<br/>GCGTAAAGCGCACGTAGGCTGTTATGTAAGTCAGGGGTGAAAGCCCACGGCTCAACCGTGGAA<br/>CTGCCCTTGATACTGCACGACTCGAATCCGGGAGAGGGTGGCGGAATTCCAGGTGTAGGAGTG<br/>AAATCCGTAGATATCTGGAGGAACATCAGTGGCGAAGGCGGCCACCTGGACCGGTATTGACGCT<br/>GAGGTGCGAAAGCGTGGGGAGCAAACAGGATTAGATACCCTGGTAGTCCACGCCGTAAACGATG<br/>GATGCTAGATGTCGGGATGTATGTCTCGGTGTCGTAGTTAACGCGTTAAGCATCCCGCCT</p>    |
| <p><i>Dialister invisus</i><br/>SILVA ID:<br/>JN713211.1.1560</p>                                                                                                                                                           | <p>ATCCGGGACGAGAAGGCAGGGTGCGAAGAACAACACTGCATTGACGGTACCGGAAAAGCAAGCC<br/>ACGGCTAACTACGTGCCAGCAGCCGCGGTAATACGTAGGTGGCAAGCGTTGTCCGGAATTATTG<br/>GGCGTAAAGCGCGCGCAGGCCGGCTTCCCAAGTCCCTCTTAAAAGTGCGGGGCTTAACCCCGTG<br/>ATGGAAAGGAAACTGGGAAGCTGGAGTATCGGAGAGGAAAGTGAATTCTAGTGTAGCGGTGA<br/>AATGCGTAGAGATTAGGAAGAACACCGGTGGCGAAGGCGACTTTCTGGACGAAAAGTACGCTG<br/>AGGCGCGAAAGCGTGGGGAGCAAACAGGATTAGATTCCCTGGTAGTCCACGCCGTAAACGATG<br/>GATACTAGGTGTAGGAGGTATCGACCCCTCCTGTGCCGGAGTTAACGCAATAAGTATCCC</p>    |
| <p><i>Escherichia-Shigella</i><br/>SILVA ID:<br/>GZ772340.7303.8824</p>                                                                                                                                                     | <p>CAGCGGGGAGGAAGGGAGTAAAGTTAATACCTTTGCTCATTGACGTTACCCGCAGAAGAAGCAC<br/>CGGCTAACTCCGTGCCAGCAGCCGCGGTAATACGGAGGGTGCAAGCGTTAATCGGAATTAAGTGG<br/>GCGTAAAGCGCACGCAGGCCGGTTTGTAAAGTCAAGTGTGAAATCCCCGGGCTCAACCTGGGAA<br/>CTGCATCTGATACTGGCAAGCTTGAGTCTCGTAGAGGGGGGTAGAATTCCAGGTGTAGCGGTGA<br/>AATGCGTAGAGATCTGGAGGAATACCGGTGGCGAAGGCGGCCCCCTGGACGAAGACTGACGCT<br/>CAGGTGCGAAAGCGTGGGGAGCAAACAGGATTAGATACCCTGGTAGTCCACGCCGTAAACGATG<br/>TCGACTTGAGGTTGTGCCCTTGAGGCGTGGCTTCCGGAGCTAACGCGTTAAGTCGACCG</p> |
| <p><i>Fusobacterium</i><br/>SILVA ID:<br/>GQ301040.1.1415</p>                                                                                                                                                               | <p>TTTTCGGAATGTAAAGTGCTTTCAGTTGGGAAGAAAGAAATGACGGTACCAACAGAAGAAGTGAC<br/>GGCTAAATACGTGCCAGCAGCCGCGGTAATACGTATGTCACGAGCGTTATCCGGATTTATTGGGC<br/>GTAAAGCGCGTCTAGGTGGTTATGTAAGTCTGATGTGAAAATGCAGGGCTCAACTCTGTATTGCGT<br/>TGGAAACTGTATACTAGAGTACTGGAGAGGTAAGCGGAAGTACAAGTGTAGAGGTGAAATTCGTA<br/>GATATTTGTAGGAATGCCGATGGGGAAGCCAGCTTACTGGACAGATACTGACGCTGAAGCGCGAA<br/>AGCGTGGGTAGCAAACAGGATTAGATACCCTGGTAGTCCACGCCGTAAACGATGATTACTAGGTG<br/>TTGGGGGTGCAACCTCAGCGCCCAAGCAAACGCGATAAGTAATCCCGCT</p>    |
| <p><i>Ruminococcus</i><br/>SILVA ID:<br/>X94967.1.1481<br/>(The genus <i>Ruminococcus</i> corresponds<br/>to the sum of SILVA genera<br/><i>Ruminococcus 1</i>, <i>Ruminococcus 2</i> and<br/><i>Lachnoclostridium</i>)</p> | <p>AGTATTTCCGGTATGTAAAGCTCTATCAGCAGGGAAGAAATGACGGTACCTGACTAAGAAGCCCC<br/>GGCTAACTACGTGCCAGCAGCCGCGGTAATACGTAGGGGGCAAGCGTTATCCGGATTTACTGGG<br/>TGTAAGGGAGCGTAGACGGCATGGCAAGCCAGATGTGAAAGCCCAGGGGCTCAACCCCGGGA<br/>CTGCATTTGGAAGTGTGAGGCTAGAGTGTGCGAGAGGAAAGCGGAATTCTAGTGTAGCGGTGA<br/>AATGCGTAGATATTAGGAGGAACACCAAGTGGCGAAGGCGGCTTTCTGGACGATGACTGACGTTG<br/>AGGCTCGAAAGCGTGGGGAGCAAACAGGATTAGATACCCTGGTAGTCCACGCCGTAAACGATGA<br/>ATACTAGGTGTCGGGTGGCAAAGCCATTCCGGTGCCGCAGCAAACGCAATAAGTATTCCA</p> |

|                                                                                                                                                       |                                                                                                                                                                                                                                                                                                                                                                                                                                                                                               |
|-------------------------------------------------------------------------------------------------------------------------------------------------------|-----------------------------------------------------------------------------------------------------------------------------------------------------------------------------------------------------------------------------------------------------------------------------------------------------------------------------------------------------------------------------------------------------------------------------------------------------------------------------------------------|
| <p><i>Lactobacillus</i><br/>SILVA ID:<br/>EF533990.1.1531</p>                                                                                         | <p>TGGTAGTGAAGAAAGATAGAGGTAGTAAGTGGCCTTTATTTGACGGTAATTACTTAGAAAAGTCACG<br/>GCTAACTACGTGCCAGCAGCCGCGGTAATACGTAGGTGGCAAGCGTTGTCCGGATTTATTGGGC<br/>GTAAAGCGAGTGCAGGCGGTTCAATAAGTCTGATGTGAAAGCCTTCGGCTCAACCGGAGAATTG<br/>CATCAGAACTGTTGAACTTGAGTGCAGAAGAGGAGAGTGGAACTCCATGTGTAGCGGTGGAAT<br/>GCGTAGATATATGGAAGAACACCAGTGGCGAAGGCGGCTCTCTGGTCTGCAACTAACGCTGAGG<br/>CTCGAAAGCATGGGTAGCGAACAGGATTAGATACCCTGGTAGTCCATGCCGTAACGATGAGTGC<br/>TAAGTGTGGGAGGTTTCCGCCTCTCAGTGTGCAGCTAACGCATTAAGCACTCC</p>  |
| <p><i>Methanobrevibacter smithii</i><br/>SILVA ID:<br/>U55235.1.1357</p>                                                                              | <p>TCCCAAGTGCCATTCTTAACGGGATGGCTTTTCATTAGTGTAAAGAGCTTTTGAATAAGAGCTGG<br/>GCAAGACCGGTGCCAGCCGCGCGGTAACACCGGCAGCTCTAGTGGTAGCAGTTTTTATTGGG<br/>CCTAAAGCGTCCGTAGCCGGTTAATAAGTCTCTGGTCAAATCCTGCAGCTTAACTGTGGGAATTG<br/>CTGGAGATACTATTAGACTTGAGATCGGGAGAGGTTAGAGGTAAGTCCCAGGGTAGAGGTGAAATT<br/>CTGTAATCCTGGGAGGACCGCCTGTTGCGAAGGCGTCTGACTGGAACGATTCTGACGGTGAGG<br/>GACGAAAGCTAGGGGCGCGAACCGGATTAGATACCCTGGTAGTCCCTAGCTGTAAACGATGCGGA<br/>CTTGGTGTGGGGTGGCTTTGAGCTGTCCAGTGCCGAAGGGAAGCTGTTAAGTCC</p> |
| <p><i>Odoribacter</i><br/>SILVA ID:<br/>AB490805.1.1478</p>                                                                                           | <p>CTCTTTTCTACTGGGAGAATAAGCCCTATGTATAAGGTGATGACAGTACAGTAGGAATAAGCATCGG<br/>CTAACTCCGTGCCAGCAGCCGCGGTAATACGGAGGATGCGAGCGTTATCCGGATTTATTGGGTTT<br/>AAAGGGTGCCTAGGCGGCTTTATAAGTTAGTGGTAAAATTTCCGAGCTTCACTCCGGTCCGCCAT<br/>TAAACTGTAGAGCTAGAGAATGGACGAGGTAGGCGGAATAAGTTAAGTAGCGGTGAAATGCATAG<br/>ATATACTTAGAACTCCGATAGCGAAGGCAGCTTACCAGACCATAACTGACGCTGATGCACGAGA<br/>GCGTGGGTAGCGAACAGGATTAGATACCCTGGTAGTCCACGCGTAAACGATGCTCACCGGCC<br/>TTAGCGATAAGACAGTTAGGGGTTAATTGAAAGAATTAAGTGAAGCCACC</p>   |
| <p><i>Oxalobacter formigenes</i><br/>SILVA ID:<br/>U49757.1.1488</p>                                                                                  | <p>TGTCAGGGAAGAAATTGATTGGGCTAATATCCCGATTAGATGACGGTACCTGAAGAATAAGCACCG<br/>GCTAACTACGTGCCAGCAGCCGCGGTAATACGTAGGGTGCAGCGTTAATCGGAATTACTGGGC<br/>GTAAAGCGTGCAGCAGGCGGTTGTGTAAGACAGATGTGAAATGCCCGGGCTCAACCTGGGAATTG<br/>CATTTGTGACTGCACGGCTAGAGTGTGTCAGAGGGGGGTAGAATCCACGTGTAGCAGTGAAT<br/>GCGTAGATATGTGGAGGAATACCGATGGCGAAGGCAGCCCCCTGGGATAACACTGACGCTCATG<br/>CACGAAAGCGTGGGGAGCAAACAGGATTAGATACCCTGGTAGTCCACGCACTAAACGATGTCCA<br/>CTAGTTGTTGGGTCTTAATAGACTTAGTAACGCAGCTAACGCGTGAAGTCGACCGC</p> |
| <p><i>Clostridium</i><br/>SILVA ID:<br/>AB023971.1.1404<br/>(The genus <i>Clostridium</i> corresponds to<br/>SILVA genus <i>Peptoclostridium</i>)</p> | <p>AGGCCTTCGGGTGCTAAAGCTCTGTCCTCAAGGAAGATAATGACGGTACTTGAGGAGGAAGCCC<br/>CGGCTAACTACGTGCCAGCAGCCGCGGTAATACGTAGGGGGCTAGCGTTATCCGGATTTACTGG<br/>GCGTAAAGGGTGCCTAGGCGGCTTTCAAGTCAAGGATTAAGGCTACGGCTCAACCGTAGTAA<br/>GCTCCTGATACTGTCTGACTTGAGTGCAGGAGAGGAAAGCGGAATCCAGTGTAGCGGTGAAA<br/>TGCGTAGATATTGGGAGGAACACCAGTAGCGAAGGCGGCTTTCTGGACTGTAAGTACGCTGAG<br/>GCACGAAAGCGTGGGGAGCAAACAGGATTAGATACCCTGGTAGTCCACGCTGTAAACGATGAGT<br/>ACTAGGTGTCCGAGGTTACCCCTTCGGTGCAGCTAACGCATTAAGTACTCCGCC</p>        |

|                                                                                                                                                                                                                                                                                     |                                                                                                                                                                                                                                                                                                                                                                                                                                                                                                        |
|-------------------------------------------------------------------------------------------------------------------------------------------------------------------------------------------------------------------------------------------------------------------------------------|--------------------------------------------------------------------------------------------------------------------------------------------------------------------------------------------------------------------------------------------------------------------------------------------------------------------------------------------------------------------------------------------------------------------------------------------------------------------------------------------------------|
| <p><i>Clostridium difficile</i><br/> SILVA ID:<br/> FN665653.3773870.3775372<br/> (The species <i>Clostridium difficile</i><br/> corresponds to SILVA species<br/> <i>Peptoclostridium difficile</i>)</p>                                                                           | <p>AGGCCTTCGGGTCGTAAAACCTCTGTCCTCAAGGAAGATAATGACGGTACTTGAGGAGGAAGCCC<br/> CGGCTAACTACGTGCCAGCAGCCGCGGTAATACGTAGGGGGCTAGCGTTATCCGGATTTACTGG<br/> GCGTAAAGGGTGCCTAGGCGGTCTTTCAAGTCAGGAGTGAAAGGCTACGGCTCAACCGTATTAA<br/> GCTCTTAAAAGTGGGAGACTTGAGTGCAGGAGAGGAGAGTGGAATTCCTAGTGTAGCGGTGAAA<br/> TGCGTAGATATTAGGAGGAACACCAGTTGCGAAGGCGGCTCTCTGGACTGTAACGACGCTGAG<br/> GCACGAAAGCGTGGGGAGCAAACAGGATTAGATACCCTGGTAGTCCACGCTGTAACGATGAGT<br/> ACTAGGTGTCCGGGGTTACCCCTCGGTGCCGCAGCTAACGCATTAAGTACTCCGC</p>      |
| <p><i>Prevotella</i><br/> SILVA ID:<br/> AB547700.1.1481<br/> (The genus <i>Prevotella</i> corresponds to<br/> the sum of SILVA genera <i>Prevotella</i>,<br/> <i>Prevotella 1</i>, <i>Prevotella 2</i>, <i>Prevotella 6</i>,<br/> <i>Prevotella 7</i> and <i>Prevotella 9</i>)</p> | <p>TGCTTTTATGCGGGGATAAAGTGAGGGACGTGTCTTCATTGCAGGTACCGCATGAATAAGGACC<br/> GGCTAATCCGTGCCAGCAGCCGCGGTAATACGGAAGGTCCGGGCGTTATCCGGATTTATTGGGT<br/> TTAAAGGGAGCGTAGGCCGTGGATTAAGCGTGTGTGAAATGCAGGTGCTCAACGTCTGCACTG<br/> CAGCGCGAACTGGTCCACTTGAGTGTGCGCAACGCAGGCGGAATTCGTCTGTAGCGGTGAAA<br/> TGCTTAGATATGACGAAGAACTCCGATTGCGAAGGCAGCTTGCGGGAGCACAACGACGCTGAA<br/> GCTCGAAAGTGCGGGTATCGAACAGGATTAGATACCCTGGTAGTCCGCACGGTAAACGATGGATG<br/> CCCGTTGTCAGGCTGTTTCAGCCTGGTGACCAAGCGAAAGCATTAAAGCATCCCACC</p>      |
| <p><i>Roseburia</i><br/> SILVA ID:<br/> AJ270473.1.1454</p>                                                                                                                                                                                                                         | <p>TATTTCCGGTATGTAAGCTCTATCAGCAGGGAAGAAGAAATGACGGTACCTGACTAAGAAGCACCG<br/> GCTAAATACGTGCCAGCAGCCGCGGTAATACGTATGGTGCAAGCGTTATCCGGATTTACTGGGTGT<br/> AAAGGGAGCGCAGGCCGGAAGGCTAAGTCTGATGTGAAAGCCCGGGGCTCAACCCCGGTAAGT<br/> CATTGAAAAGTGGTTCATCTAGAGTGTGCGAGGGGTAAGTGGAATTCCTAGTGTAGCGGTGAAATG<br/> CGTAGATATTAGGAGGAACACCAGTGGCGAAGGCGGCTTACTGGACGATAACTGACGCTGAGGC<br/> TCGAAAGCGTGGGGAGCAAACAGGATTAGATACCCTGGTAGTCCACGCCGTAAACGATGAATACT<br/> AGGTGTCGGAAGCACAGCTTTTCGGTGCCGCCGCAAACGCATTAAGTATTCCA</p> |
| <p><i>Ruminococcus albus</i><br/> SILVA ID:<br/> X85098.1.1458</p>                                                                                                                                                                                                                  | <p>AGGTTTTAGGATTGTAACCTCTGTCTTTGGGGACGATAATGACGGTACCCAAGGAGGAAGCTCC<br/> GGCTAACTACGTGCCAGCAGCCGCGGTAATACGTAGGGAGCGAGCGTTGTCCGGAATTACTGGG<br/> TGTAAGGGAGCGTAGGCCGGATTGCAAGTCAGGTGTGAAATTTAGGGGCTTAACCCCTGAACT<br/> GCACTTGAAACTGTAGTTCTTGAGTGAAGTAGAGGTAAGCGGAATTCCTAGTGTAGCGGTGAAAT<br/> GCGTAGATATTAGGAGGAACATCAGTGGCGAAGGCGGCTTACTGGGCTTTAACTGACGCTGAGG<br/> CTCGAAAGCGTGGGGAGCAAACAGGATTAGATACCCTGGTAGTCCACGCCGTAAACGATGATTAC<br/> TAGGTGTGGGGGGACTGACCCCTTCCGTGCCGAGTTAACACAATAAGTAATCCAC</p>    |
| <p><i>Salmonella</i><br/> SILVA ID:<br/> AF029226.1.1498</p>                                                                                                                                                                                                                        | <p>CAGCGGGGAGGAAGGCGATAAGGTTAATAACCTTGTTGATTGACGTTACCCGCAGAAGAAGCAC<br/> CGGCTAACTCCGTGCCAGCAGCCGCGGTAATACGGAGGGTGCAAGCGTTAATCGGAATTACTGG<br/> GCGTAAAGCGCACGCAGGCGGTCTGTCAAGTCGGATGTGAAATCCCCGGGCTGAACCTGGGAA<br/> CTGCATCCGAAACTGGCAAGCTTGAGTCTCGTAGAGGGGGGTAGAATTCAGGTGTAGCGGTGA<br/> AATGCGTAGAGATCTGGAGGAATACCGGTGGCGAAGGCGGCCCCCTGGACGAAGACTGACGCT<br/> CAGGTGCGAAAAGGGTGGGGAGCAAACAGGATTAGATACCCTGGTAGTCCACGCCGTAAACGATG<br/> TCGACTTGAGGTTGTGCCCTTGAGGCGTGGCTTCCGGAGCTAACGCGTTAAGTCGACCG</p>   |

*Salmonella enterica*  
SILVA ID:  
AB273733.1.1331

CAGCGGGGAGGAAGGTGTTGTGGTTAATAACCGCAGCAATTGACGTTACCCGCAGAAGAAGCAC  
CGGCTAACTCCGTGCCAGCAGCCGCGGTAATACGGAGGGTGCAAGCGTTAATCGGAATTACTGG  
GCGTAAAGCGCACGCAGGCGGTCTGTCAAGTCGGATGTGAAATCCCCGGGCTCAACCTGGGAA  
CTGCATTTCGAAACTGGCAGGCTTGAGTCTTGTAGAGGGGGGTAGAATTCCAGGTGTAGCGGTGA  
AATGCGTAGAGATCTGGAGGAATACCGGTGGCGAAGGCGGCCCCCTGGACAAAGACTGACGCT  
CAGGTGCGAAAGCGTGGGGAGCAAACAGGATTAGATACCCTGGTAGTCCACGCCGTAACGATG  
TCTACTTGGAGGCTGTGCCCTTGAGGCGTGGCTTCCGGAGCTAACCGGTTAAGTAGACCG

*Streptococcus sanguinis*  
SILVA ID:  
AB002524.1.1358

GTAAGAGAAGAACGGGTGTGAGAGTGGAAAGTTCACACTGTGACGGTATCTTACCAGAAAGGGA  
CGGCTAACTACGTGCCAGCAGCCGCGGTAATACGTAGGTCCCGAGCGTTGTCCGGATTTATTGG  
GCGTAAAGCGAGCGCAGGCGGTTAGATAAGTCTGAAGTTAAAGGCTGTGGCTTAACCATAGTATG  
CTTTGGAAACTGTTAACTTGAGTGCAGAAGGGGAGAGTGGAAATCCATGTGTAGCGGTGAAATG  
CGTAGATATATGGAGGAACACCGGTGGCGAAAGCGGCTCTCTGGTCTGTAAGTACGCTGAGGC  
TCGAAAGCGTGGGGAGCAAACAGGATTAGATACCCTTGTAGTCCACGCCGTAACGATGAGTGCT  
AGGTGTTAGGCCCTTCCGGGGCTCAGTGCCGCAGCTAACGCATTAAGCACTCC

*Veillonella*  
SILVA ID:  
X84006.1.1513

AATCGGGACGAAAGGCCTTCTTGCGAATAGTTAGAAGGATTGACGGTACCGGAATAGAAAGCCAC  
GGCTAACTACGTGCCAGCAGCCGCGGTAATACGTAGGTGGCAAGCGTTGTCCGGAATTATTGGG  
CGTAAAGCGCGCGCAGGCGGATTGGTCAGTCTGTCTTAAAAGTTCGGGGCTTAACCCCGTGATG  
GGATGGAAGCTGCCAATCTAGAGTATCGGAGAGGAAAGTGGAAATCCTAGTGTAGCGGTGAAATG  
CGTAGATATTAGGAAGAACACCAGTGGCGAAGGCGACTTTCTGGACGAAAAGTACGCTGAGGC  
GCGAAAGCCAGGGGAGCGAACGGGATTAGATACCCTGGTAGTCCGCGTAAACGATGGGTA  
CTAGGTGTAGGAGGTATCGACCCCTTCTGTGCCGGAGTTAACGCAATAAGTACCCC

*Vibrio cholerae*  
SILVA ID:  
AY292952.1.1451

CAGTAGGGAGGAAGGTGGTTAAGTTAATACCTTAATCATTTGACGTTACCTACAGAAGAAGCACCG  
GCTAACTCCGTGCCAGCAGCCGCGGTAATACGGAGGGTGCAAGCGTTAATCGGAATTACTGGGC  
GTAAAGCGCATGCAGGTGGTTTGTAAAGTCAGATGTGAAAGCCCTGGGCTCAACCTAGGAATCG  
CATTTGAAACTGACAAGCTAGAGTACTGTAGAGGGGGGTAGAATTCAGGTGTAGCGGTGAAATG  
CGTAGAGATCTGAAGGAATACCGGTGGCGAAGGCGGCCCCCTGGACAGATACTGACACTCAGAT  
GCGAAAGCGTGGGGAGCAAACAGGATTAGATACCCTGGTAGTCCACGCCGTAACGATGTCTAC  
TTGGAGGTTGTGCCCTAGAGGTGTGGCTTTCGGAGCTAACCGGTTAAGTAGACCG
